# Supplementary material for: FaSmi1 Is Essential for the Vegetative Development, Asexual Reproduction, DON Production and Virulence of Fusarium asiaticum
Source: MDPI journal article supplement (doi:10.3390/jof8111189), 2022-11-11
Supplement: s1 [file s1]

**Figure S1**

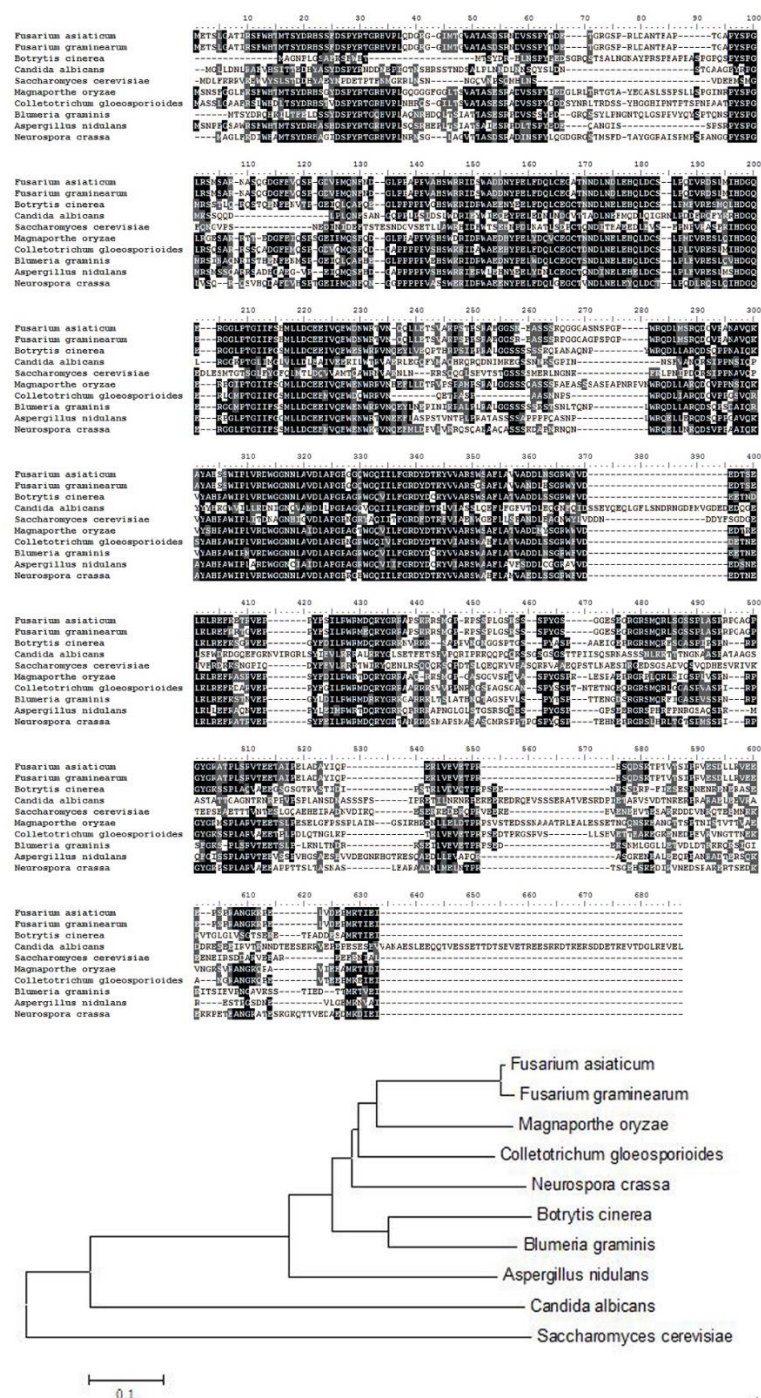

Figure S1. Protein sequence of the selected fungal FaSmi1 orthologs were aligned with the BioEdit 3 software. Identical amino acids are highlighted in gray. The protein sources are *Botrytis cinerea* (XP\_024553765.1), *Candida albicans* (KGU13037.1), *Saccharomyces cerevisiae* (NP\_011745.1), *Magnaporthe oryzae* (XP\_003719889.1), *Colletotrichum gloeosporioides* (XP\_011326681.1), *Blumeria graminis* (CAD6501685.1), *Aspergillus nidulans* (XP\_682115.1), *Neurospora crassa* (XP\_961149.3). Numbers indicate the amino acid positions. phylogenetic tree generated by the neighbour-joining method with Mega 4.1 software on the basis of the deduced amino acid sequences of FaSmi1 from *Fusarium asiaticum* strain 2021 and those from other fungi.

Figure S2

**A**

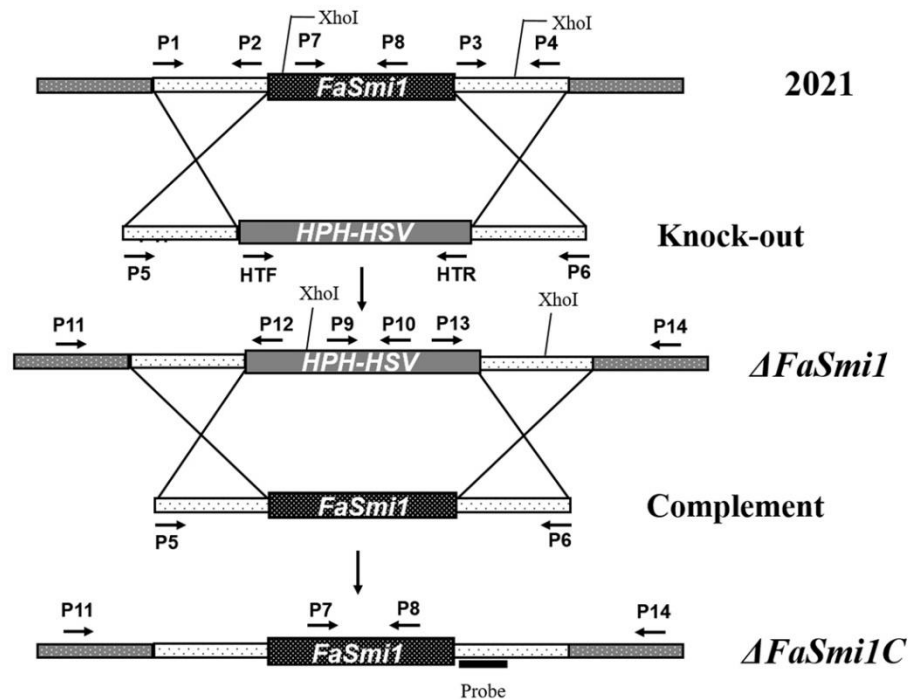

**B**

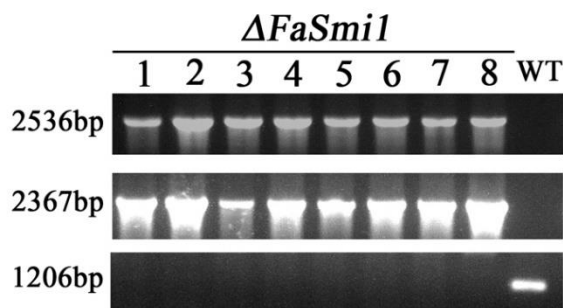

**C**

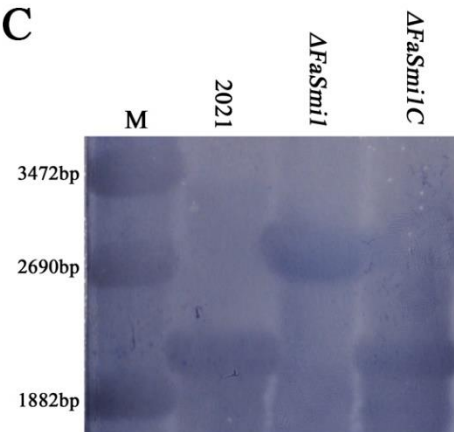

Figure S2 The generation strategy and confirmation of FaSim1 deletion mutant and complement strains.

A: FaSmi1 and hph-hsv fragments are denoted by large black and gray arrows, respectively. Annealing site of PCR primers are indicated with arrows (see Table S1 for primers sequences). B: PCR assay to screen  $\Delta FaSmi1$  transformants: PCR was performed with primer pair P11/P12; a 2139bp amplified fragment indicates  $\Delta FaSmi1$  integration at the left junction. PCR was performed with primer pair P13/P14; a 2235bp fragment amplification indicates  $\Delta FaSmi1$  integration at the right junction. PCR was performed with primer pair P7/P8 A 906bp amplification fragment indicates a WT (2021) locus. C: A 750bp FaSmi1 upstream fragment was used as a probe in Southern blot hybridization assay. Genomic DNA preparations from the wild-type strain (2021), the FaSmi1 deletion mutant ( $\Delta FaSmi1$ ) and the

complemented strain ( $\Delta FaSmi1C$ ) were digested with *XhoI*.

**Table S1.** Primer used in this study

| Name     | Sequence (5' to 3')                       | Relevant Characteristics                                                    |
|----------|-------------------------------------------|-----------------------------------------------------------------------------|
| P1       | AATAAATCTGTCAATCGGTG                      | Amplify the left homologous arm of <i>FaSmi1</i>                            |
| P2       | CTTCAATATCATCTTCTGTTG<br>GAGCTACAGAGGGAGA |                                                                             |
| P3       | AGACAATACCGGAAGGAAC<br>GCGGTGTAGGGTAACTGA | Amplify the right homologous arm of <i>FaSmi1</i>                           |
| P4       | CGAATACAACAGCCTCCT                        |                                                                             |
| P5       | CAGTCATCTGTAACCAACCA                      | Amplify the knockout vector of the <i>FaSmi1</i>                            |
| P6       | TTTTCCAGAAGGATACCA                        |                                                                             |
| P7       | CGCCCCTTTACCCACATT                        | Amplify a partial fragment of the <i>FaSmi1</i>                             |
| P8       | ACCCAGAACGAGCCACAA                        |                                                                             |
| P9       | GCAAACGTGTATGGACGACACC                    | Amplify a partial fragment of the <i>hph-hsv</i> gene                       |
| P10      | ATCTCACCTGGTCAAGGCGG                      |                                                                             |
| P11      | AATAAATCTGTCAATCGGTG                      | Confirm whether the <i>hph-hsv</i> gene homologously replaced <i>FaSmi1</i> |
| P12      | ATCTCACCTGGTCAAGGCGG                      |                                                                             |
| P13      | GCAAACGTGTATGGACGACACC                    | Confirm whether the <i>hph-hsv</i> gene homologously replaced <i>FaSmi1</i> |
| P14      | CGAATACAACAGCCTCCT                        |                                                                             |
| HTF      | ACAGAAGATGATATTGAAGGAGC                   | Amplify the <i>hph-hsv</i> gene                                             |
| HTR      | TGTTCTTCCGGTATTGTCTC                      |                                                                             |
| FaSmi1-F | ATGGAGACCTCTCTCGGTGCGAC                   | Amplify the full cDNA or genomic sequence of the <i>FaSmi1</i>              |
| FaSmi1-R | CAATGAAGACCATCGAGATTTAA                   |                                                                             |
| Probe-F  | GGATGAACTTGGTGGTC                         | Amplify probe for the Southern blotting                                     |
| Probe-R  | TTGGTGAGGGCATTGTTA                        |                                                                             |
